# Supplementary material
Source: Research Square preprint supplement (doi:10.21203/rs.3.rs-10118188/v1)

**Analysis**

**Prevalence of *Fasciola* infection**

Out of 100 examined cattle, 39 animals were positive for *Fasciola spp.*, giving an overall prevalence of **39.0%**.

Regarding species distribution:

- *Fasciola hepatica* was detected in **20.0%**
- *Fasciola gigantica* in **12.0%**
- *Fasciola magna* in **7.0%**

Some animals showed mixed infections involving more than one species.

- Positive cattle were older on average than negative cattle: **5.21 vs 4.29 years**
- Age was significantly associated with positivity:
  - Mann–Whitney U: **p = 0.035**
  - Logistic regression: **OR = 1.345**, 95% CI **1.056–1.712**, **p = 0.016**

**Association between age and infection**

The mean age of infected cattle (**5.21 years**) was higher than that of non-infected cattle (**4.29 years**), indicating a trend of increased infection with age.

Statistical analysis showed:

- Mann–Whitney U test: **p = 0.035**
- Logistic regression: **OR = 1.345**
- 95% CI: **1.056–1.712**
- **p = 0.016**

This indicates that **age is a significant risk factor**, with older cattle having higher odds of infection.

Figure 7. Presents overall prevalence of *Fasciola* spp, distribution of Fasciola species, Age comparison between infected and non-infected cattle


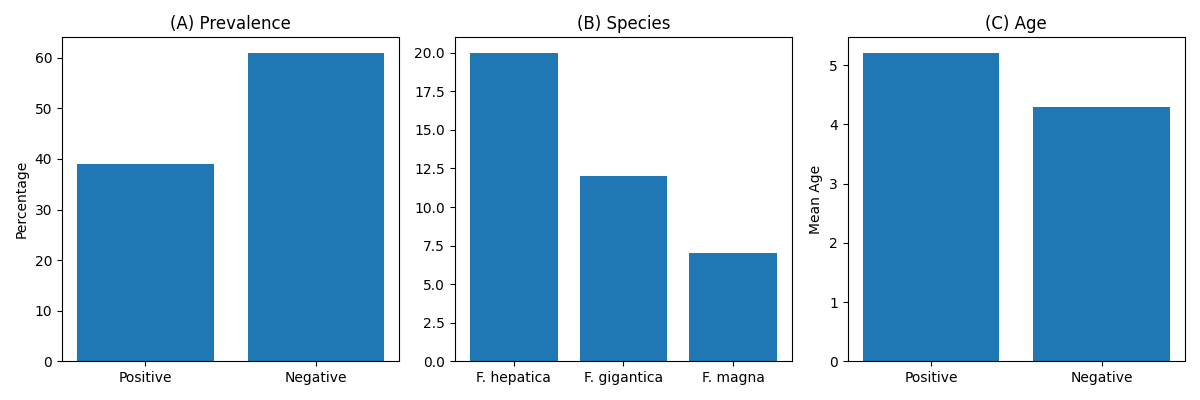


Figure 8. Statistical analysis of regression: age vs probability of infection


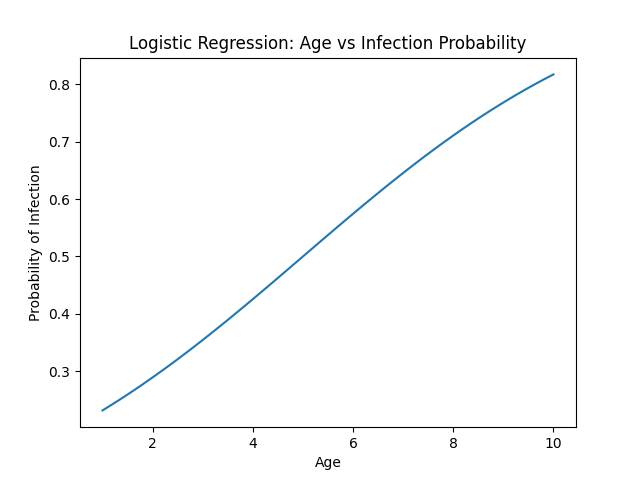

Supplement: Supplementary file 1 [file fe1667cd736c3b8efcd4a8c6.docx]
